# Supplementary material for: Effect of salt stress and nitrogen supply on seed germination and early seedling growth of three coastal halophytes
Source: PeerJ journal article supplement (doi:10.7717/peerj.14164), 2022-10-07

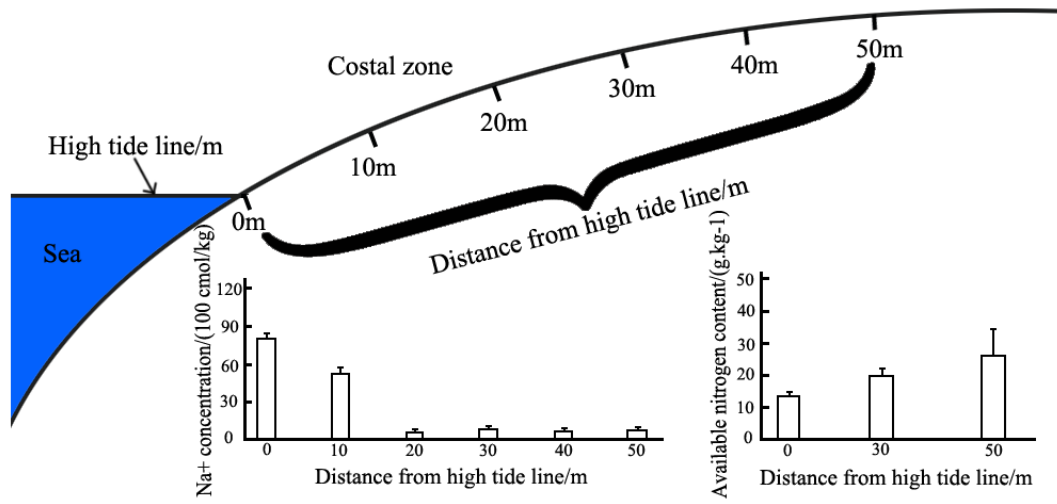

Supplement: Supplementary_File_1.pdf [file Supplementary_File_1.pdf]
